# Supplementary material for: Base induced synthesis of 4H-1,4-benzothiazines and their computational studies
Source: Royal Society of Chemistry journal article supplement (doi:10.1039/c5ra12442e), 2015-01-01
Supplement: c5ra12442e1.pdf [file c5ra12442e1.pdf]

S-1

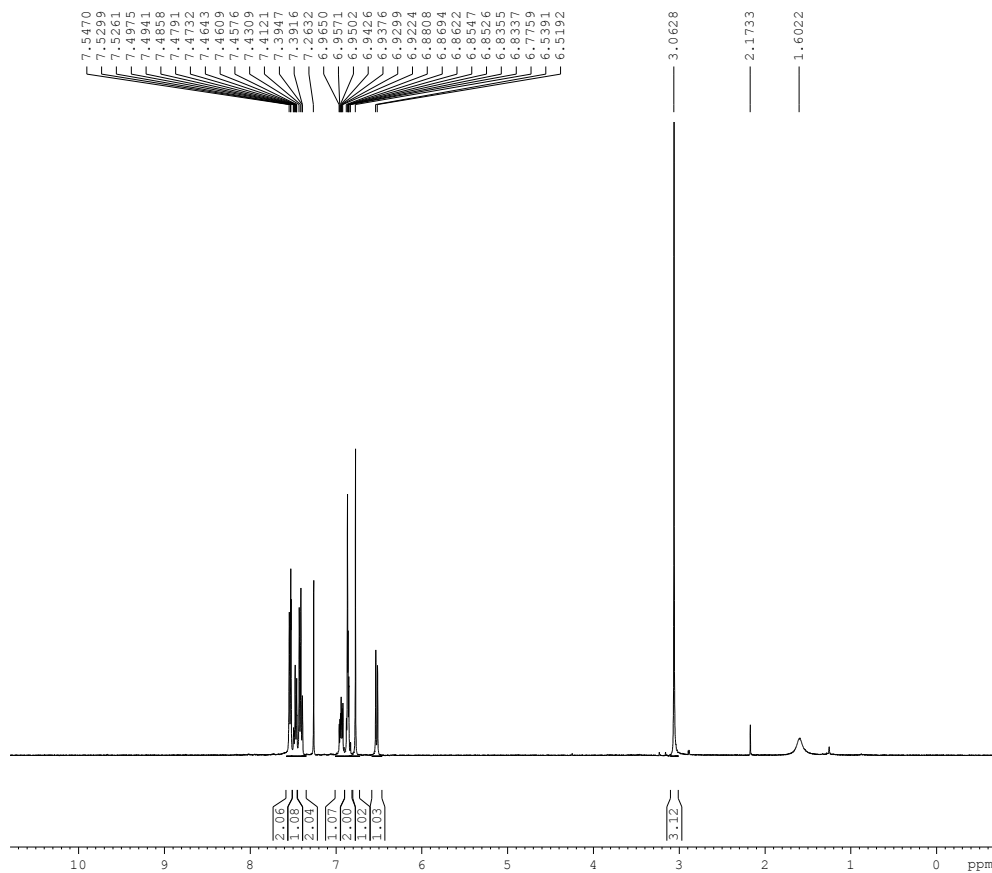

BRUKER  
AVANCE II 400 NMR  
Spectrometer  
SAIF  
Panjab University  
Chandigarh

Current Data Parameters  
NAME Mar21-2013  
EXPNO 240  
PROCNO 1

F2 - Acquisition Parameters  
Date\_ 20130321  
Time 14.28  
INSTRUM spect  
PROBHD 5 mm PABBO BB-  
PULPROG zg30  
TD 65536  
SOLVENT CDCl3  
NS 8  
DS 2  
SWH 12019.230 Hz  
FIDRES 0.183399 Hz  
AQ 2.7263477 sec  
RG 456  
DW 41.600 usec  
DE 6.00 usec  
TE 295.1 K  
D1 1.00000000 sec  
TD0 1

===== CHANNEL f1 =====  
NUC1 1H  
P1 10.90 usec  
PL1 -3.00 dB  
SFO1 400.1324710 MHz

F2 - Processing parameters  
SI 32768  
SF 400.130083 MHz  
WDW EM  
SSB 0  
LB 0.30 Hz  
GB 0  
PC 1.00

avtar\_saifpu@yahoo.co.in

<sup>1</sup>H NMR of (4-Methyl-4H-benzo[b][1,4]thiazin-2-yl)(phenyl)methanone **3(a)**

S-II

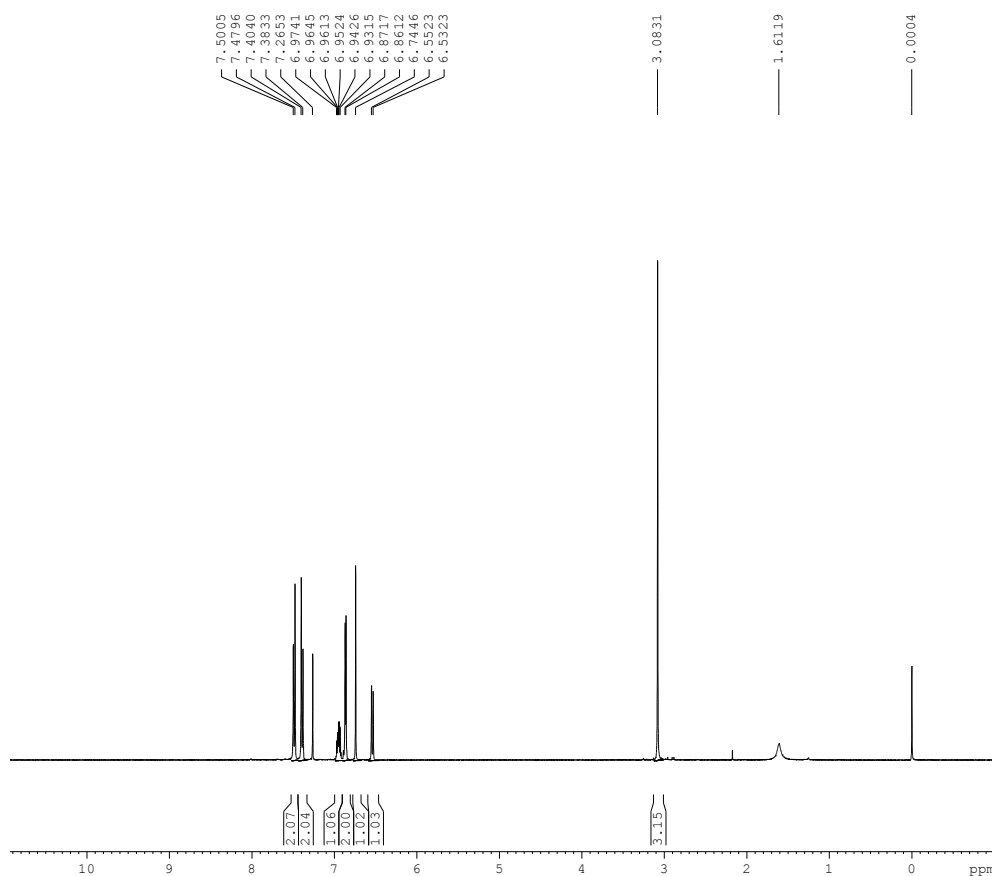

BRUKER  
AVANCE II 400 NMR  
Spectrometer  
SAIF  
Panjab University  
Chandigarh

Current Data Parameters  
NAME April-2013-Administrator  
EXPNO 250  
PROCNO 1

F2 - Acquisition Parameters  
Date\_ 20130412  
Time\_ 1.35  
INSTRUM spect  
PROBHD 5 mm PABBO BB-  
PULPROG zg30  
TD 65536  
SOLVENT DMSO  
NS 8  
DS 2  
SWH 12019.230 Hz  
FIDRES 0.183399 Hz  
AQ 2.7263477 sec  
RG 512  
DW 41.600 usec  
DE 6.00 usec  
TE 292.1 K  
D1 1.0000000 sec  
TDO 1

==== CHANNEL f1 =====  
NUC1 1H  
P1 10.90 usec  
PL1 -3.00 dB  
SFO1 400.1324710 MHz

F2 - Processing parameters  
SI 32768  
SF 400.1281069 MHz  
WDW EM  
SSB 0  
LB 0.30 Hz  
GB 0  
PC 1.00

avtar\_saifpu@yahoo.co.in

**<sup>1</sup>H NMR of (4-Chlorophenyl)(4-methyl-4H-benzo[b][1,4]thiazin-2-yl)methanone 3(b)**

S-III

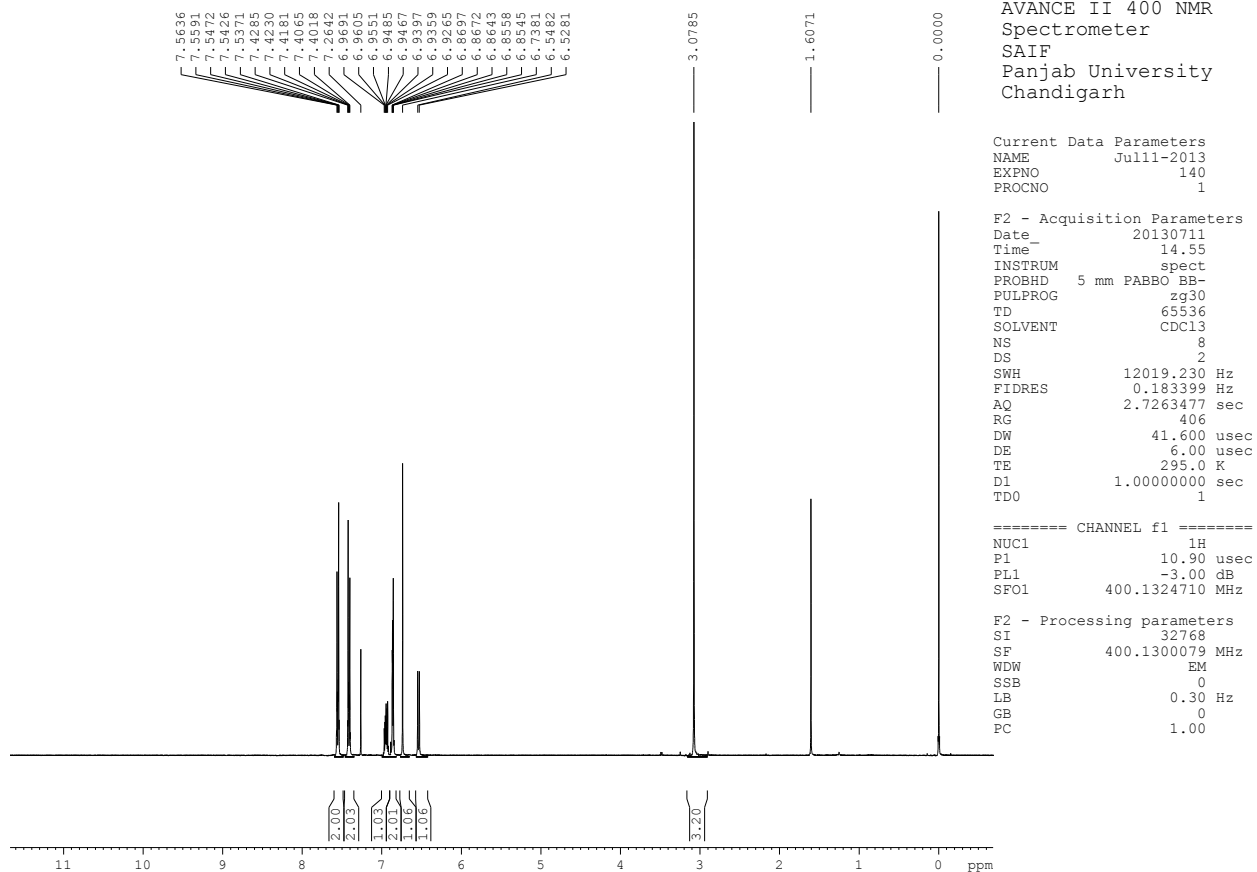

avtar\_saifpu@yahoo.co.in

**<sup>1</sup>H NMR of (4-Bromophenyl)(4-methyl-4H-benzo[b][1,4]thiazin-2-yl)methanone 3(c)**

S-IV

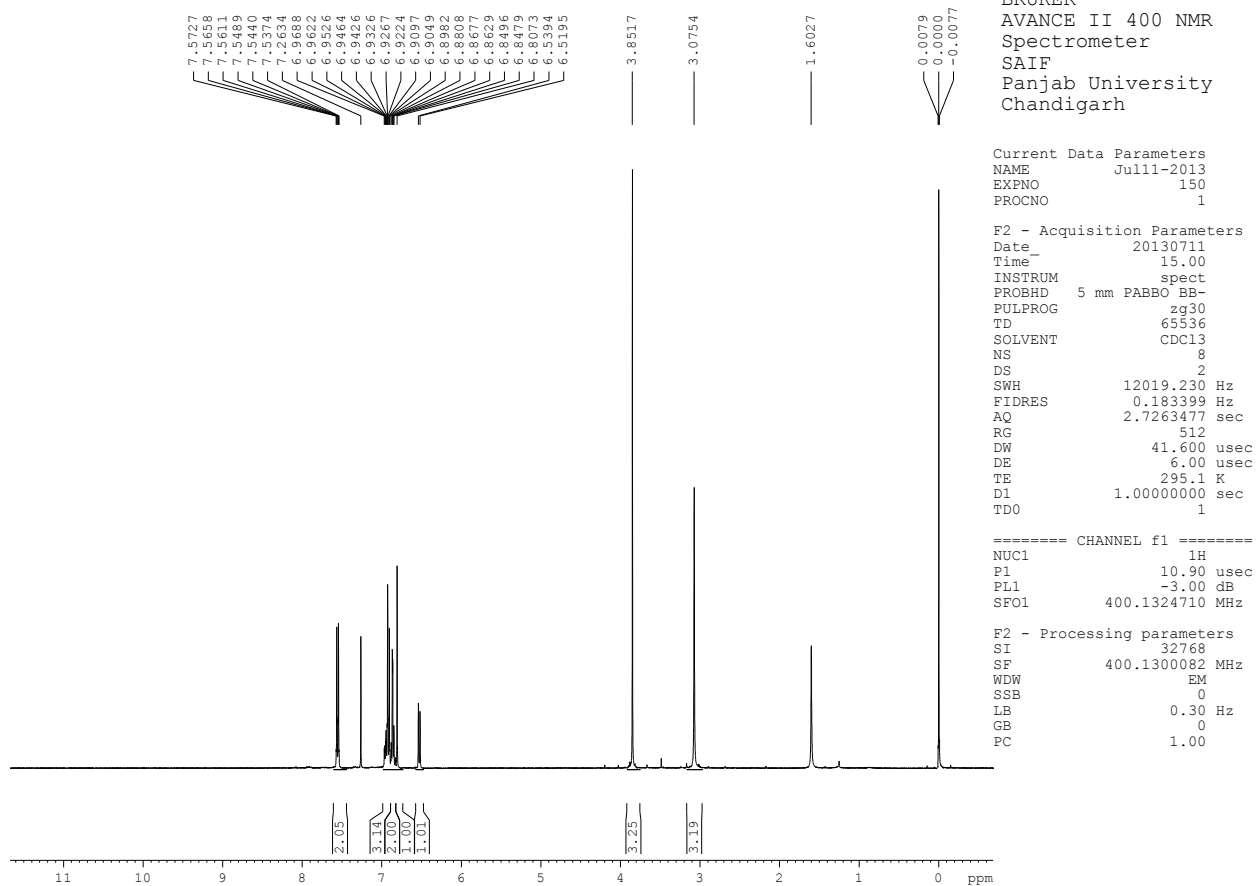

avtar\_saifpu@yahoo.co.in

**<sup>1</sup>H NMR of (4-Methoxyphenyl)(4-methyl-4H-benzo[b][1,4]thiazin-2-yl)methanone 3(d)**

S-V

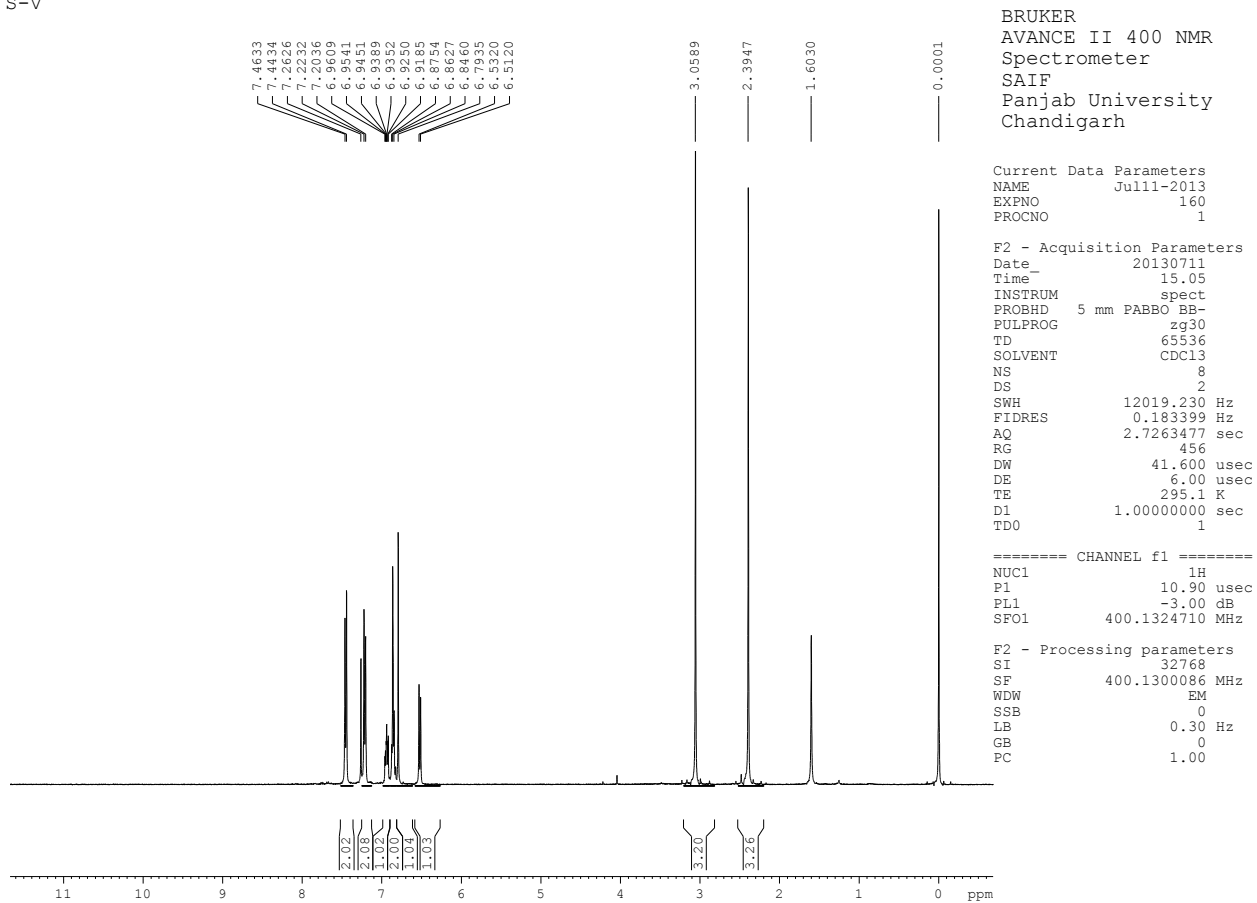

avtar\_saifpu@yahoo.co.in

**<sup>1</sup>H NMR of (4-Methylphenyl)(4-methyl-4H-benzo[b][1,4]thiazin-2-yl)methanone 3(e)**

BN-1

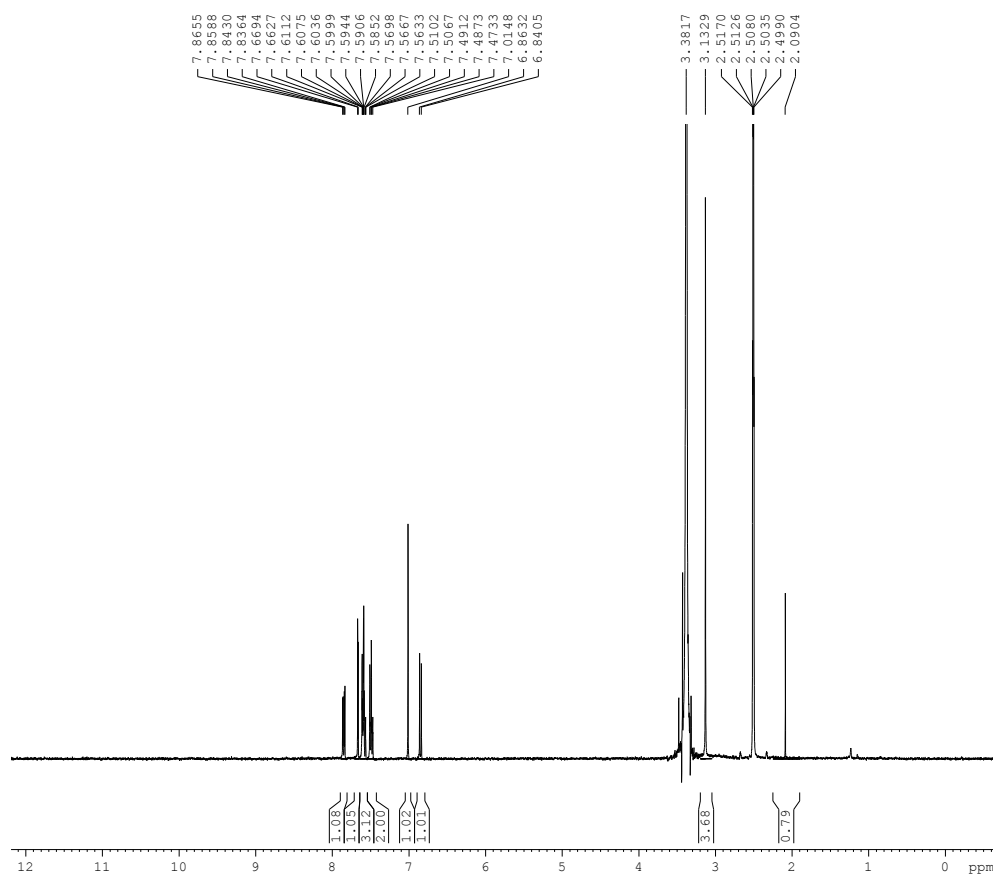

BRUKER  
AVANCE II 400 NMR  
Spectrometer  
SAIF  
Panjab University  
Chandigarh

Current Data Parameters  
NAME Feb06-2015  
EXPNO 370  
PROCNO 1

F2 - Acquisition Parameters  
Date\_ 20150208  
Time\_ 21.51  
INSTRUM spect  
PROBHD 5 mm PABBO BB-  
PULPROG zg30  
TD 65536  
SOLVENT DMSO  
NS 8  
DS 2  
SWH 12019.230 Hz  
FIDRES 0.183399 Hz  
AQ 2.7263477 sec  
RG 362  
DW 41.600 usec  
DE 6.00 usec  
TE 294.1 K  
D1 1.00000000 sec  
TD0 1

===== CHANNEL f1 =====  
NUC1 1H  
P1 10.90 usec  
PL1 -3.00 dB  
SFO1 400.1324710 MHz

F2 - Processing parameters  
SI 32768  
SF 400.1300000 MHz  
WDW EM  
SSB 0  
LB 0.30 Hz  
GB 0  
PC 1.00

avtar\_saifpu@yahoo.co.in

**<sup>1</sup>H NMR of (4-Methyl-7-nitro-4H-benzo[b][1,4]thiazin-2-yl)(phenyl)methanone (3f)**

BN-2

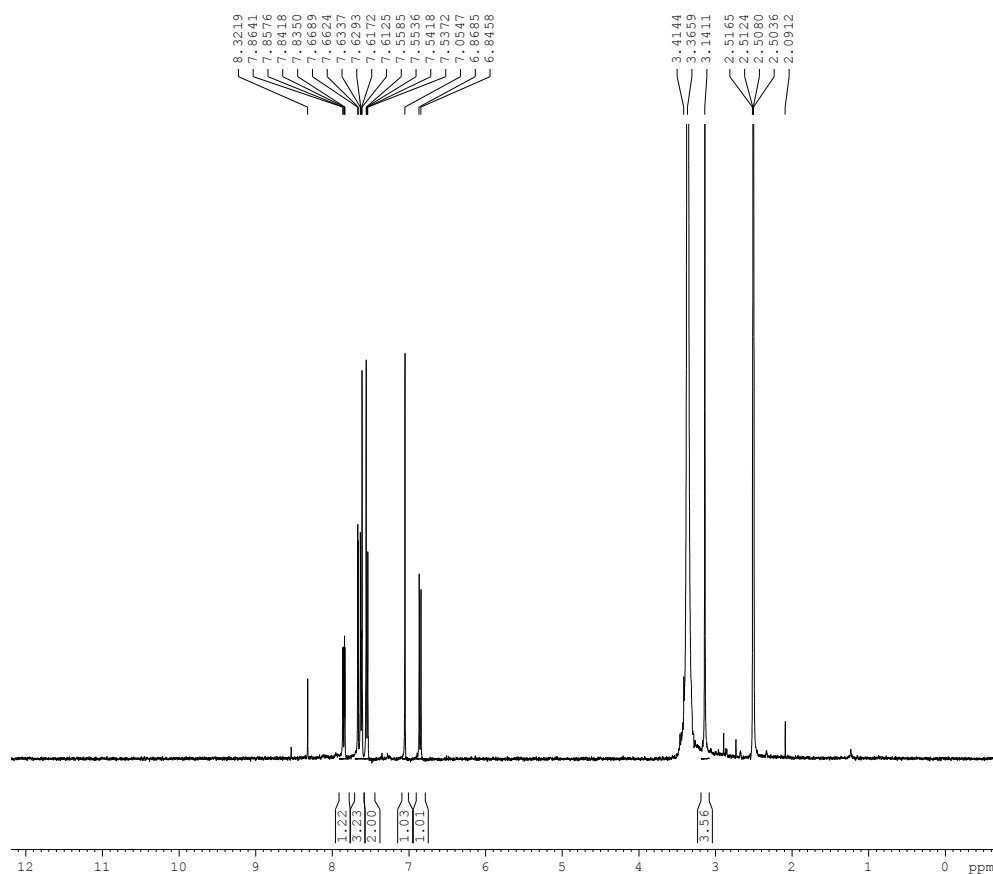

BRUKER  
AVANCE II 400 NMR  
Spectrometer  
SAIF  
Panjab University  
Chandigarh

Current Data Parameters  
NAME Feb06-2015  
EXPNO 380  
PROCNO 1

F2 - Acquisition Parameters  
Date\_ 20150208  
Time\_ 22.52  
INSTRUM spect  
PROBHD 5 mm PABBO BB-  
PULPROG zg30  
TD 65536  
SOLVENT DMSO  
NS 8  
DS 2  
SWH 12019.230 Hz  
FIDRES 0.183399 Hz  
AQ 2.7263477 sec  
RG 456  
DW 41.600 usec  
DE 6.00 usec  
TE 294.1 K  
D1 1.00000000 sec  
TD0 1

===== CHANNEL f1 =====  
NUC1 1H  
P1 10.90 usec  
PL1 -3.00 dB  
SFO1 400.1324710 MHz

F2 - Processing parameters  
SI 32768  
SF 400.1300000 MHz  
WDW EM  
SSB 0  
LB 0.30 Hz  
GB 0  
PC 1.00

avtar\_saifpu@yahoo.co.in

**<sup>1</sup>H NMR of (4-chlorophenyl)(4-Methyl-7-nitro-4H-benzo[b][1,4]thiazin-2-yl)methanone (3g)**

BN-4

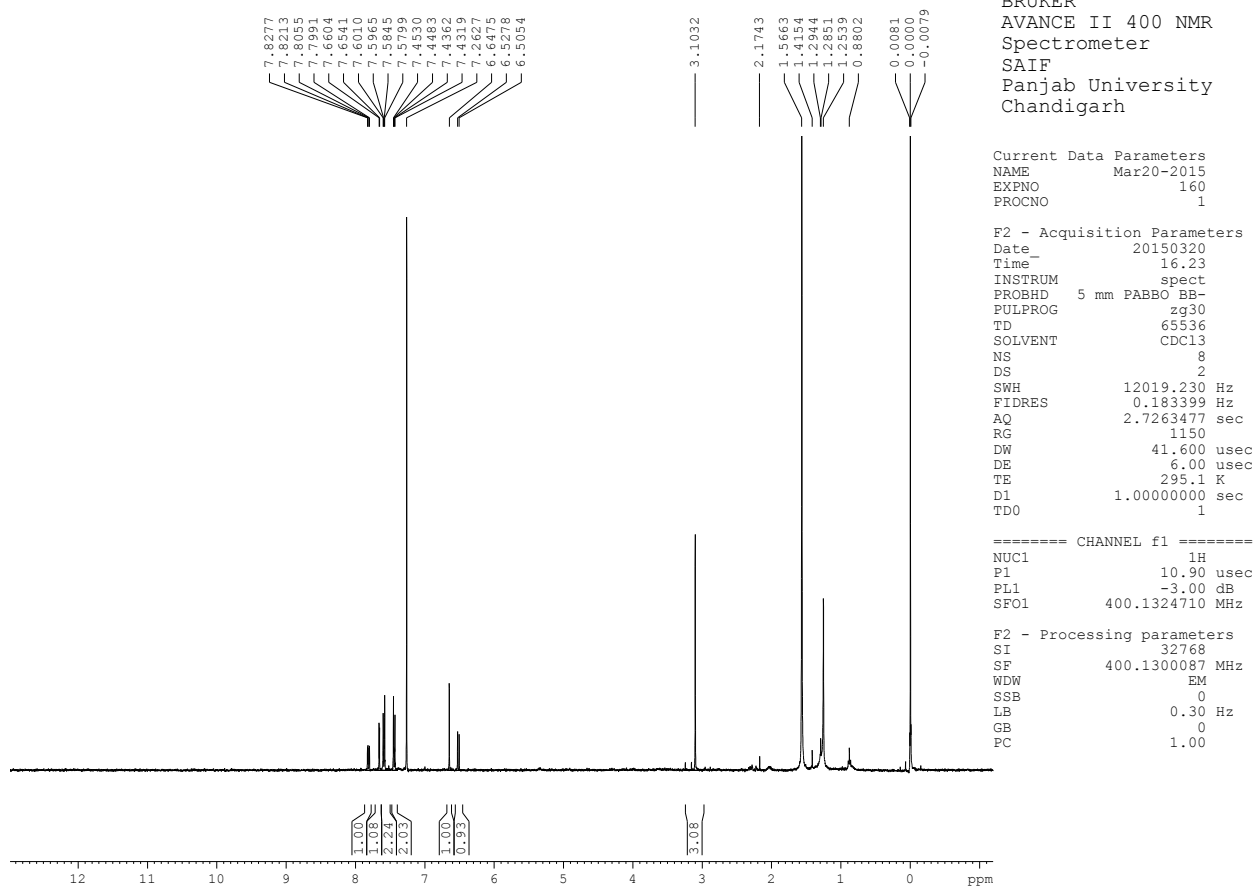

avtar\_saifpu@yahoo.co.in

**<sup>1</sup>H NMR of (4-bromophenyl)(4-methyl-7-nitro-4H-benzo[b][1,4]thiazin-2-yl) methanone (3h)**



BN-4

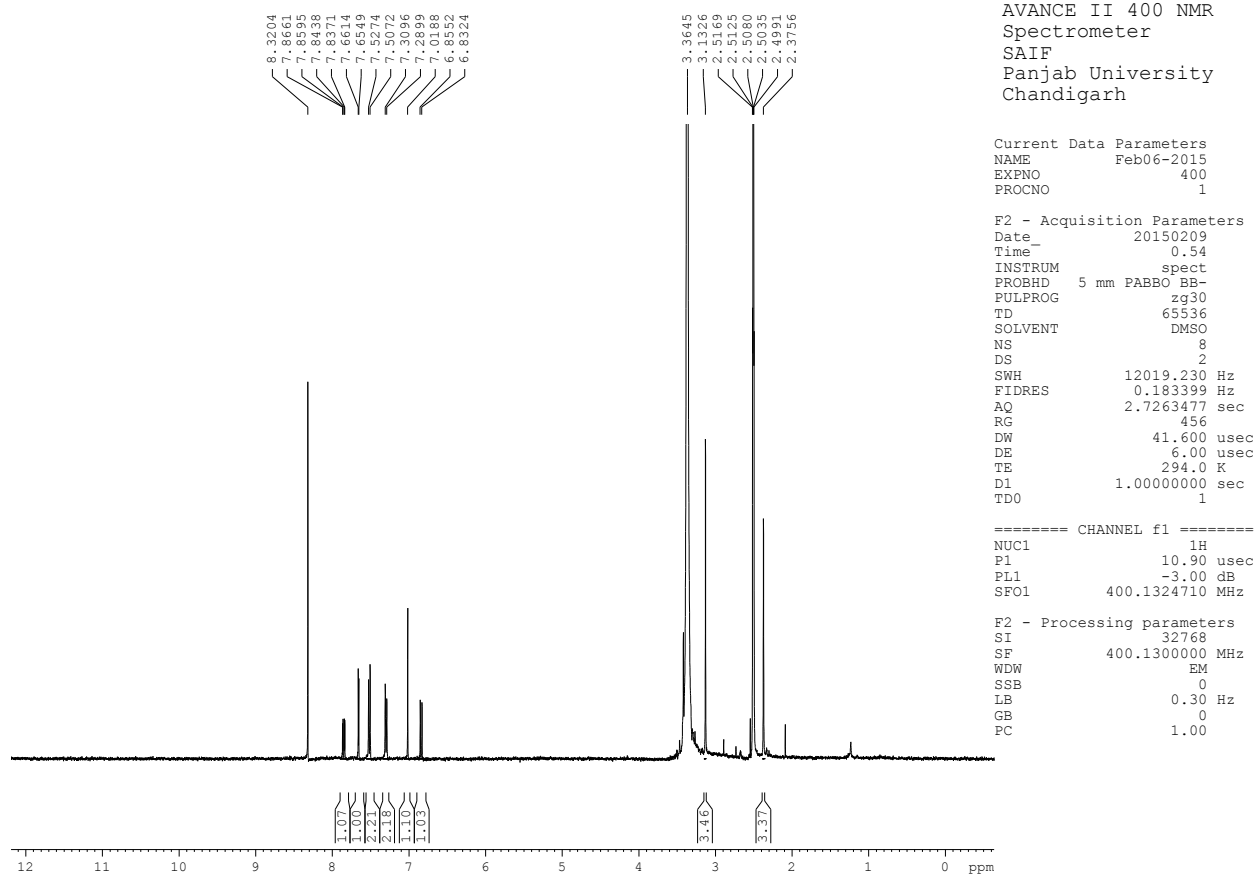

avtar\_saifpu@yahoo.co.in

**<sup>1</sup>H NMR of (4-Methyl-7-nitro-4H-benzo[b][1,4]thiazin-2-yl)(p-tolyl)methanone (3i)**

S-III

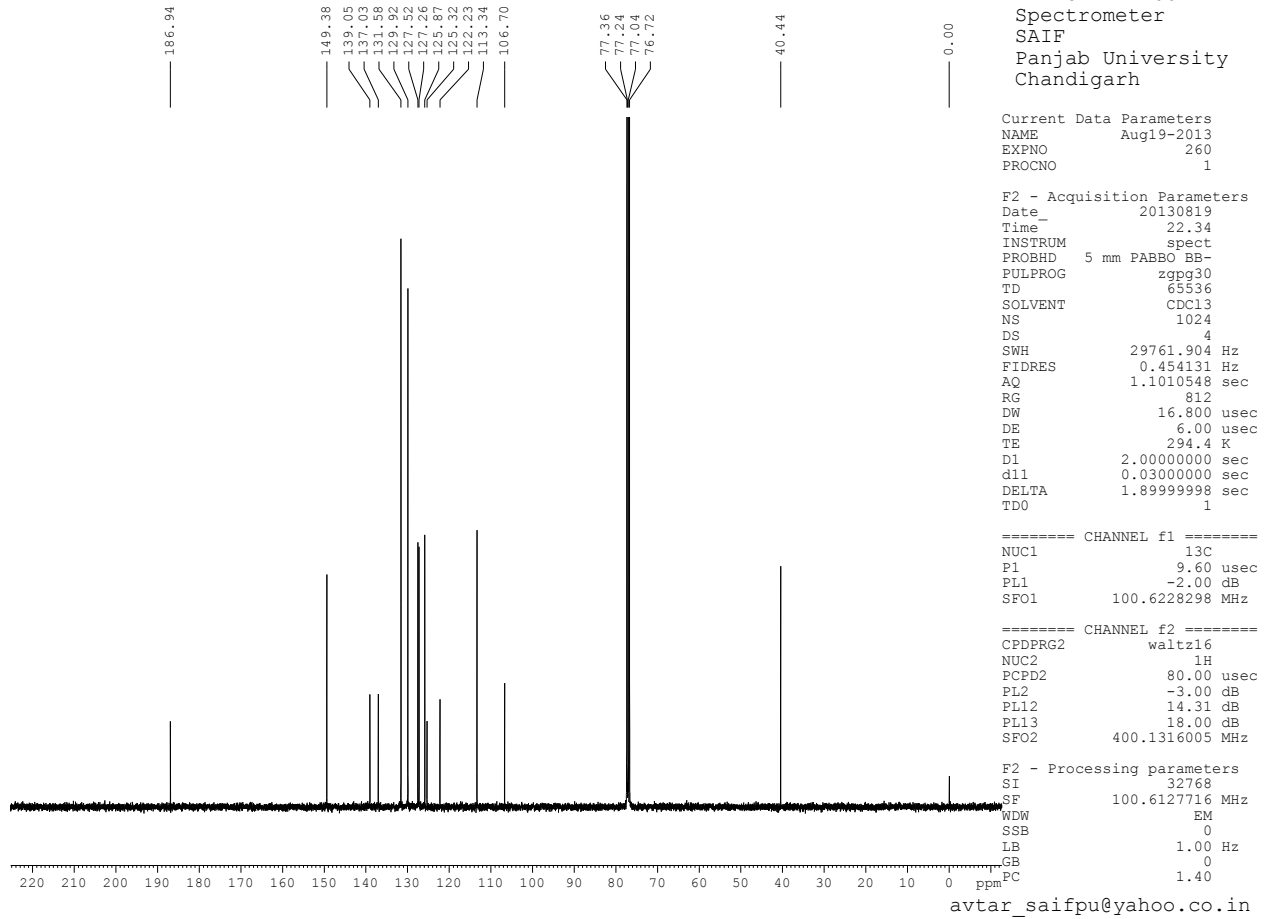

<sup>13</sup>C NMR of (4-Chlorophenyl)(4-methyl-4H-benzo[b][1,4]thiazin-2-yl)methanone **3(b)**

S-IV

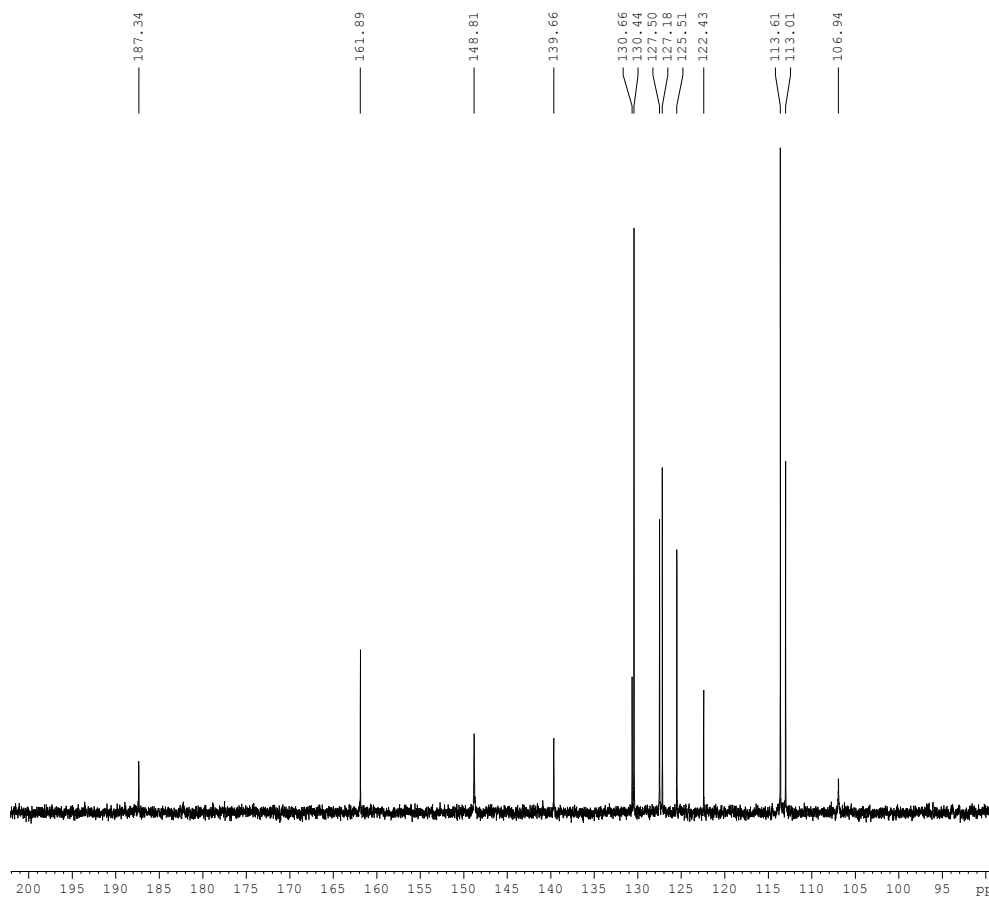

BRUKER  
AVANCE II 400 NMR  
Spectrometer  
SAIF  
Panjab University  
Chandigarh

Current Data Parameters  
NAME Aug19-2013  
EXPNO 250  
PROCNO 1  
  
F2 - Acquisition Parameters  
Date\_ 20130819  
Time 21.35  
INSTRUM spect  
PROBHD 5 mm PABBO BB-  
PULPROG zgpg30  
TD 65536  
SOLVENT CDCl3  
NS 1024  
DS 4  
SWH 29761.904 Hz  
FIDRES 0.454131 Hz  
AQ 1.1010548 sec  
RG 812  
DW 16.800 usec  
DE 6.00 usec  
TE 294.5 K  
D1 2.0000000 sec  
d11 0.0300000 sec  
DELTA 1.89999998 sec  
TD0 1

==== CHANNEL f1 =====  
NUC1 13C  
P1 9.60 usec  
PL1 -2.00 dB  
SFO1 100.6228298 MHz

==== CHANNEL f2 =====  
CPDPRG2 waltz16  
NUC2 1H  
PCPD2 80.00 usec  
PL2 -3.00 dB  
PL12 14.31 dB  
PL13 18.00 dB  
SFO2 400.1316005 MHz

F2 - Processing parameters  
SI 32768  
SF 100.6127708 MHz  
WDW EM  
SSB 0  
LB 1.00 Hz  
GB 0  
PC 1.40

avtar\_saifpu@yahoo.co.in

**<sup>13</sup>C NMR of (4-Bromophenyl)(4-methyl-4H-benzo[b][1,4]thiazin-2-yl)methanone 3(d)**

BN-2

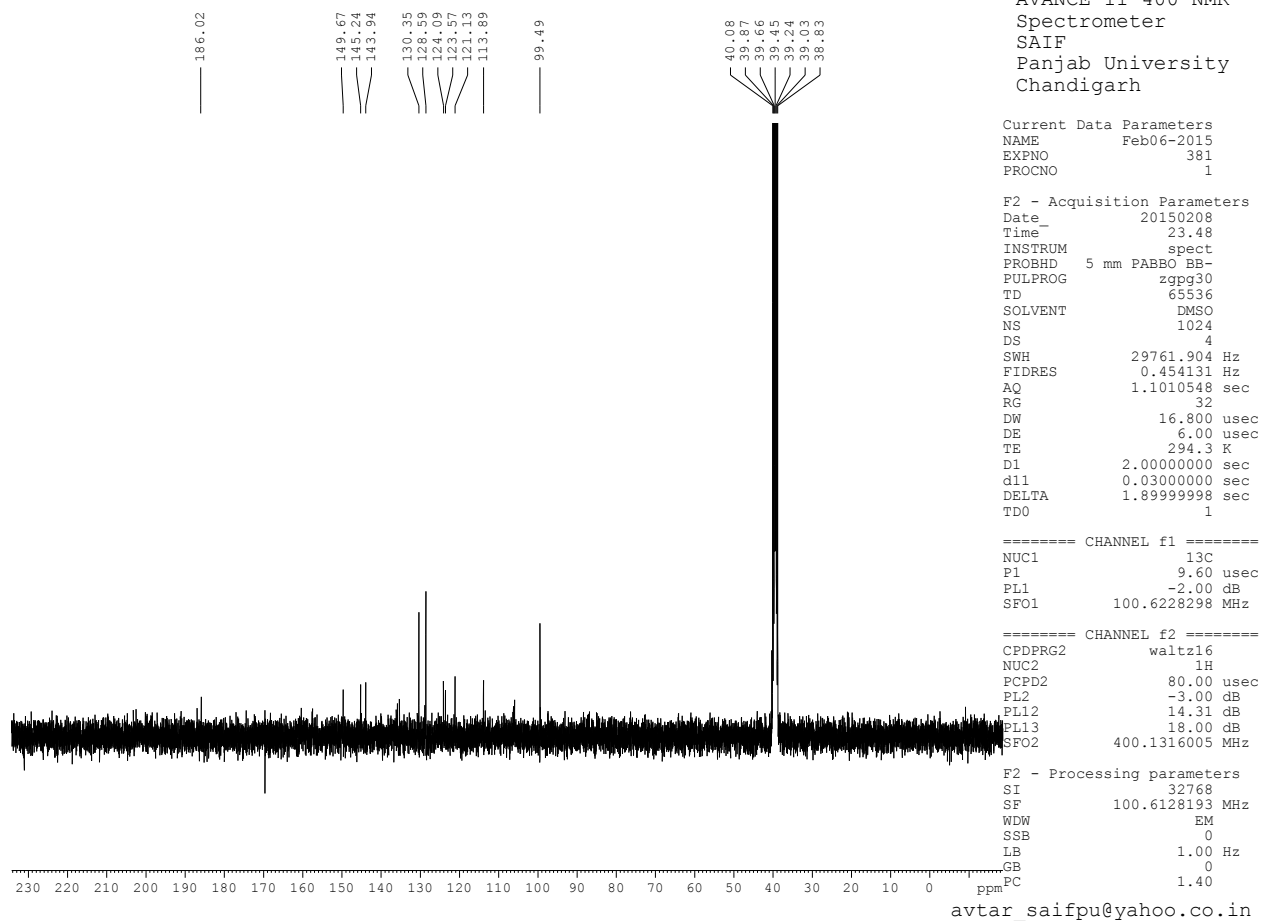

**<sup>13</sup>C NMR of (4-chlorophenyl)(4-Methyl-7-nitro-4H-benzo[b][1,4]thiazin-2-yl)methanone (3g)**

BN-3

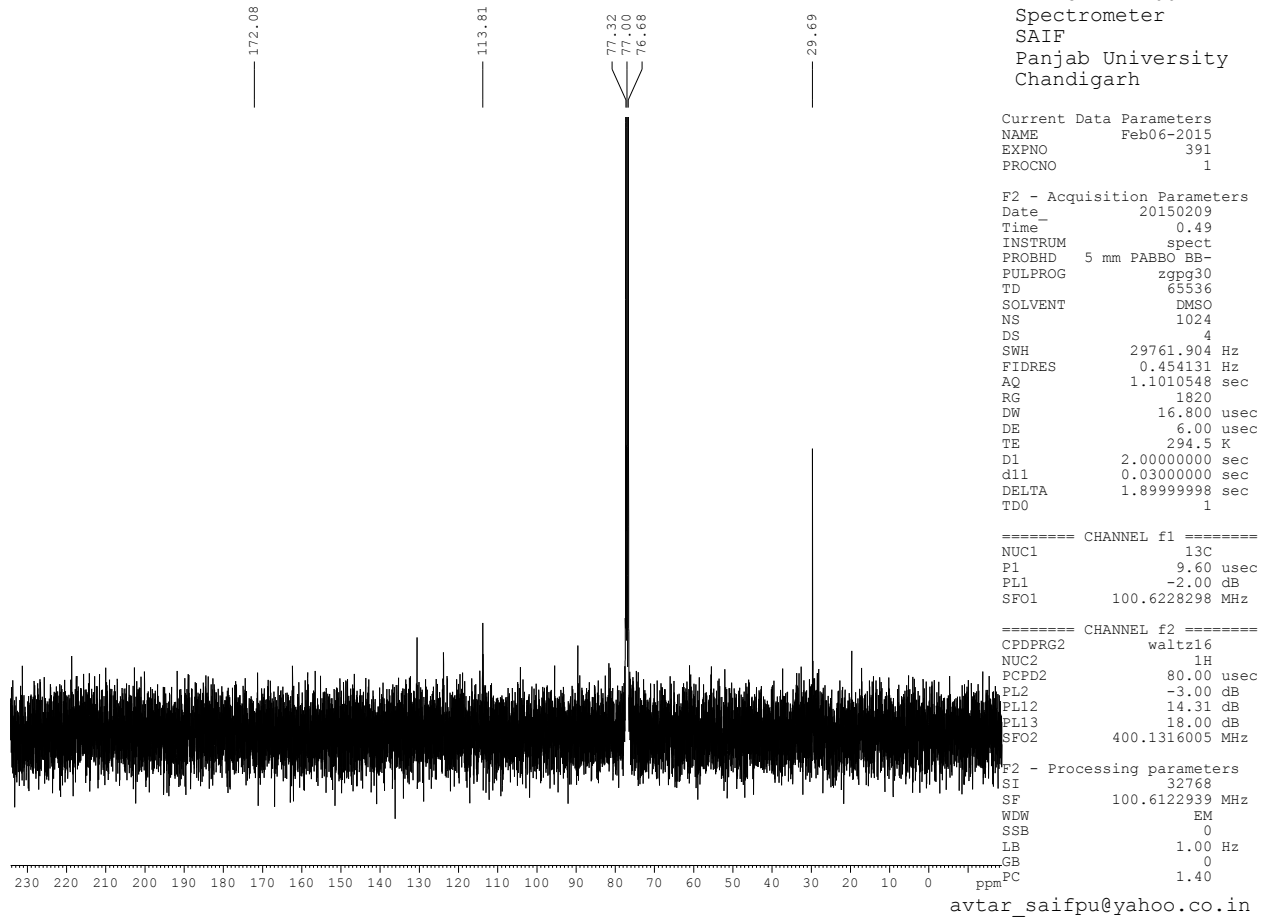

**<sup>13</sup>C NMR of (4-Methyl-7-nitro-4H-benzo[b][1,4]thiazin-2-yl)(p-tolyl)methanone (3h)**

## Mass Spectra

Spectrum

Line#: 1 R. Time: 6.215(Scan#: 1144)

MassPeaks: 419

RawMode: Averaged 6.210-6.220(1143-1145) BasePeak: 105(107139)

EGMode: Calc. from Peak Group 1 - Event 1 Scan

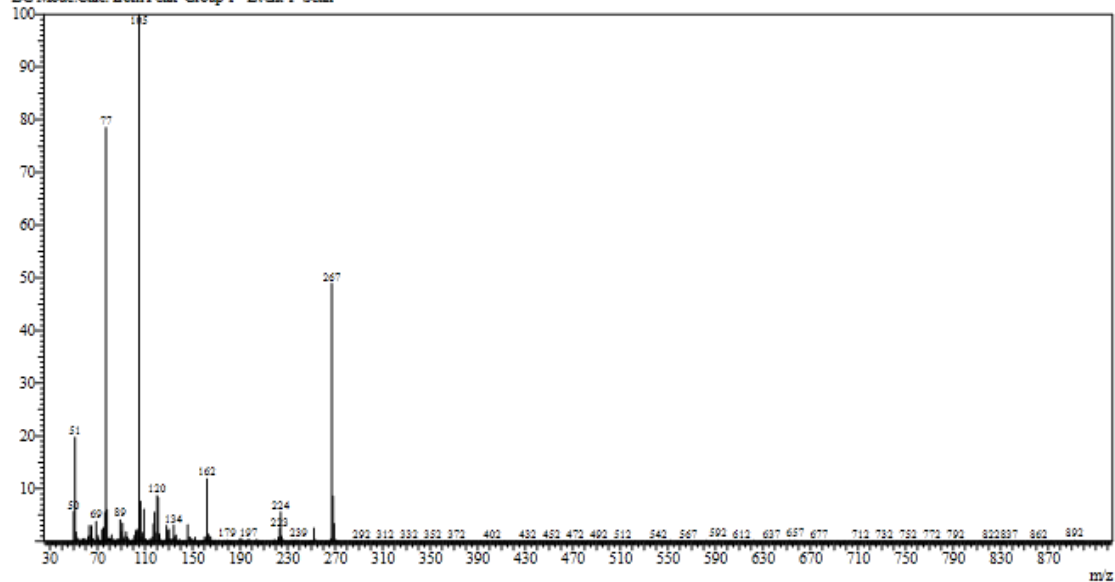

*Mass spectra of (4-Methyl-4H-benzo[b][1,4]thiazin-2-yl)(phenyl)methanone (3a)*

WATERS, Q-TOF MICROMASS (LC-MS)  
SIMERPREET S-II- 14 (0.157) Cm (1:14)

SAIF/CIL,PANJAB UNIVERSITY,CHANDIGARH  
TOF MS ES+  
3.99e3

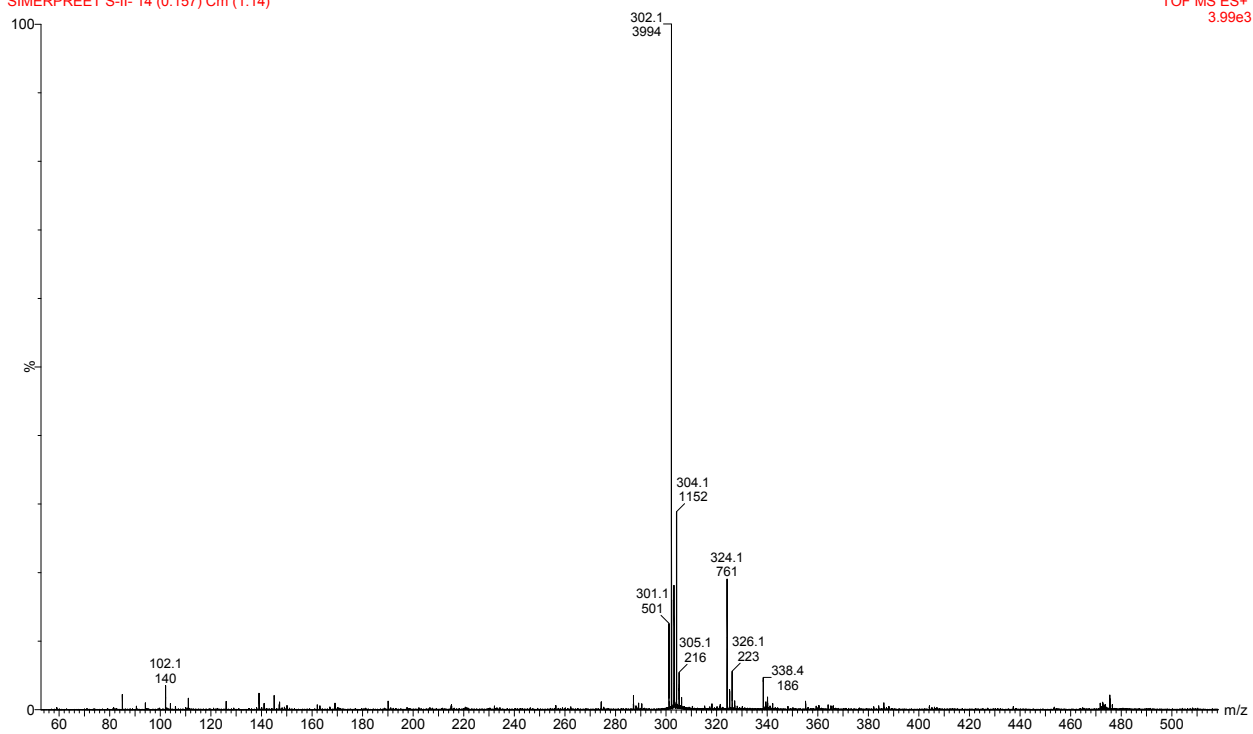

Mass spectra of (4-Chlorophenyl)(4-methyl-4H-benzo[b][1,4]thiazin-2-yl)methanone 3(b)

WATERS, Q-TOF MICROMASS (LC-MS)  
SIMERPREET S-III-9 (0.101) Cm (1:28)

SAIF/CIL, PANJAB UNIVERSITY, CHANDIGARH  
TOF MS ES+  
4.14e3

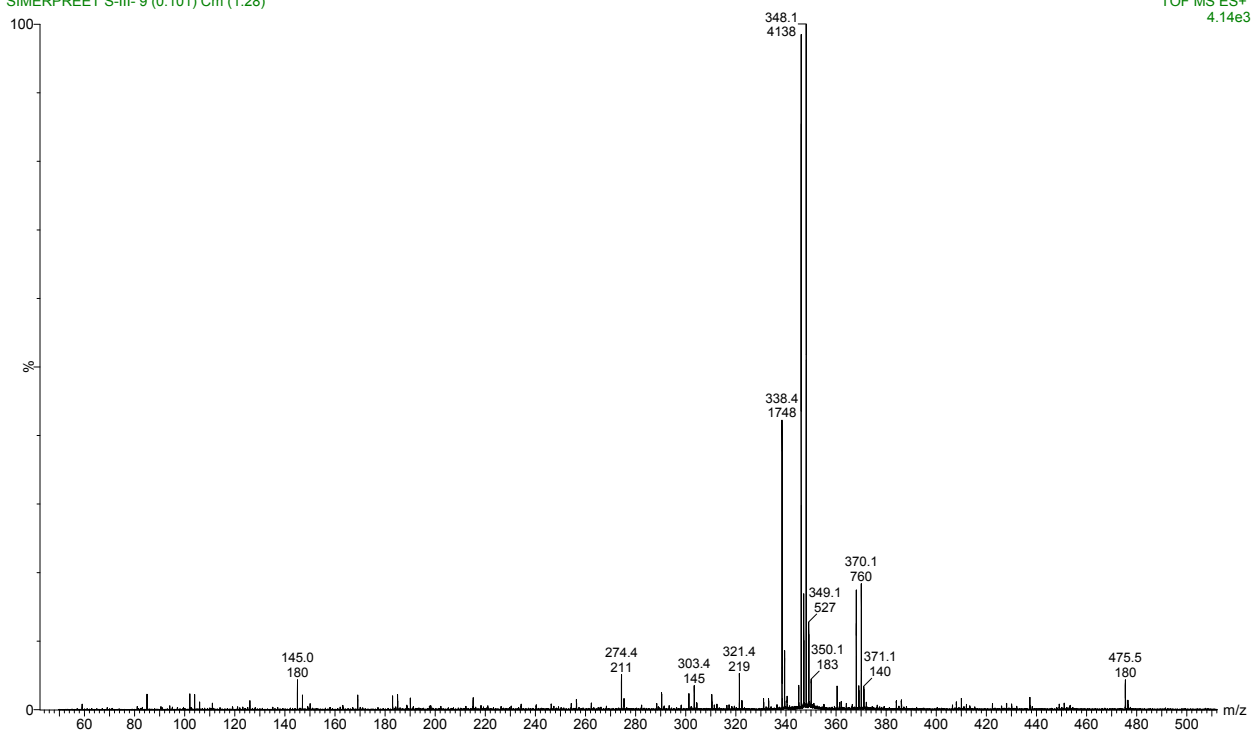

Mass spectra of (4-Bromophenyl)(4-methyl-4H-benzo[b][1,4]thiazin-2-yl)methanone **3(c)**



Spectrum

Line# 1 R.Time:6.855(Scan#:1272)

MassPeaks:325

RawMode:Averaged 6.850-6.860(1271-1273) BasePeak:135(3756830)

BGMode:Calc. from Peak Group 1 - Event 1 Scan

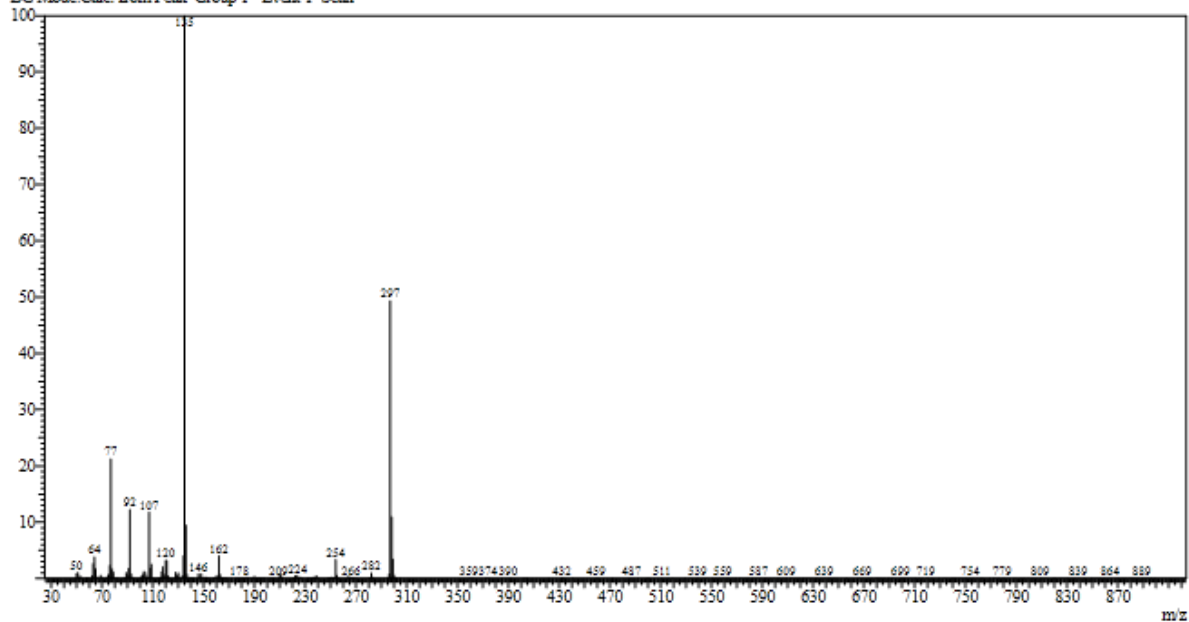

Mass spectra of *(4-Methoxyphenyl)(4-methyl-4H-benzo[b][1,4]thiazin-2-yl)methanone (3d)*

Spectrum

Line# 1 R.Time:8.560(Scan#:1113)

MassPeaks:298

RawMode:Averaged 8.555-8.565(1112-1114) BasePeak:119(27553)

BGMode:Calc. from Peak Group 1 - Event 1 Scan

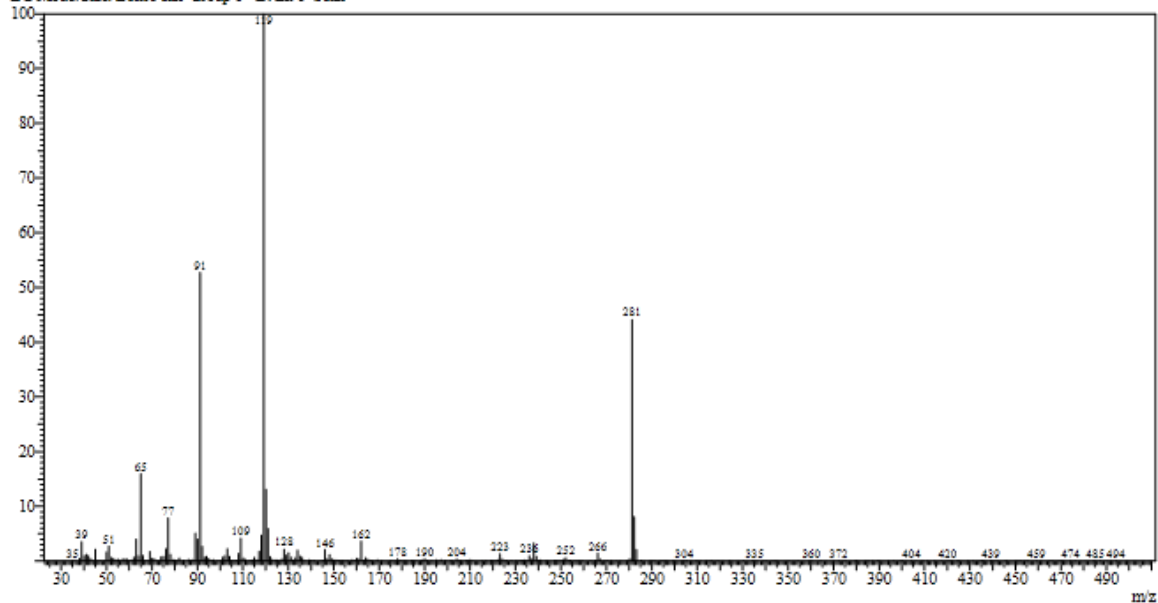

Mass spectra of *(4-Methylphenyl)(4-methyl-4H-benzo[b][1,4]thiazin-2-yl)methanone (3e)*

WATERS, Q-TOF MICROMASS (LC-MS)  
SIMERPREET BN-1 40 (0.448) Cm (1:46)

SAIF/CIL,PANJAB UNIVERSITY,CHANDIGARH  
TOF MS ES+  
1.90e3

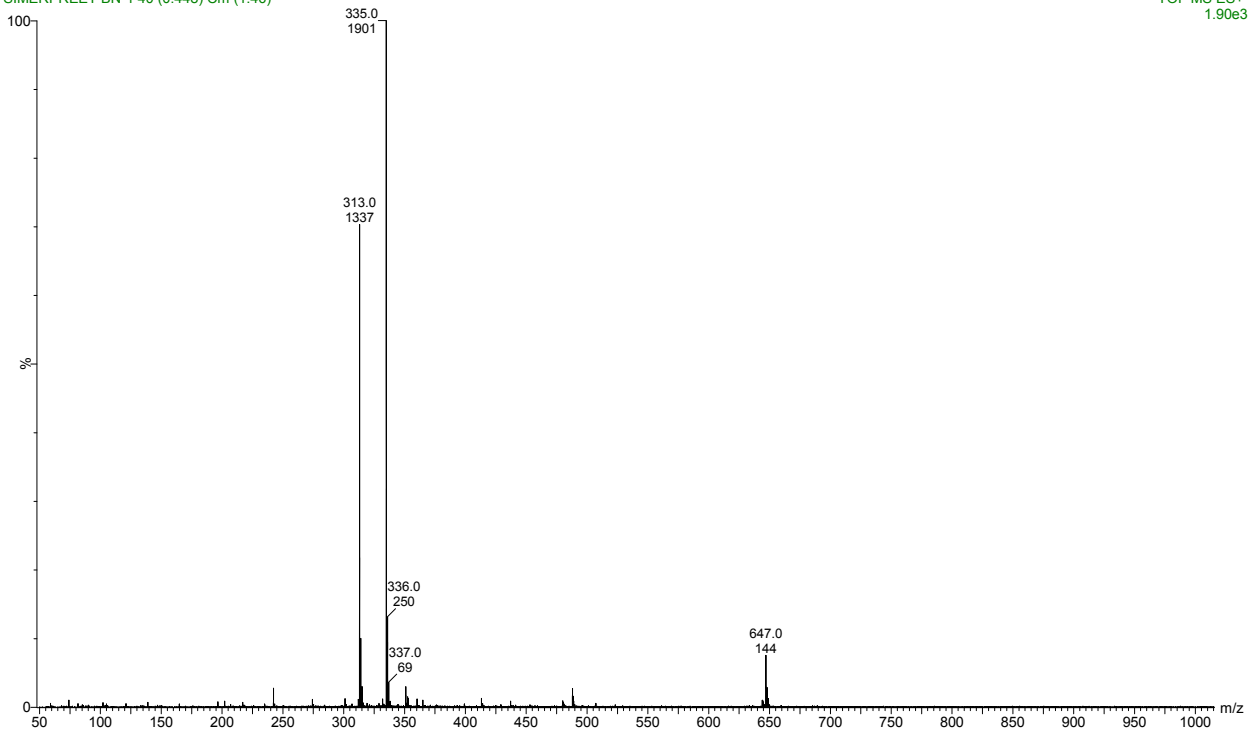

Mass spectra of (4-Methyl-7-nitro-4H-benzo[b][1,4]thiazin-2-yl)(phenyl)methanone (3f)

Spectrum

Line#: 1 R. Time: 10.950 (Scan#: 2091)  
Mass Peaks: 513  
Raw Mode: Averaged 10.945-10.955 (2090-2092) Base Peak: 139 (75106)  
BGM Mode: Calc. from Peak Group 1 - Event 1 Scan

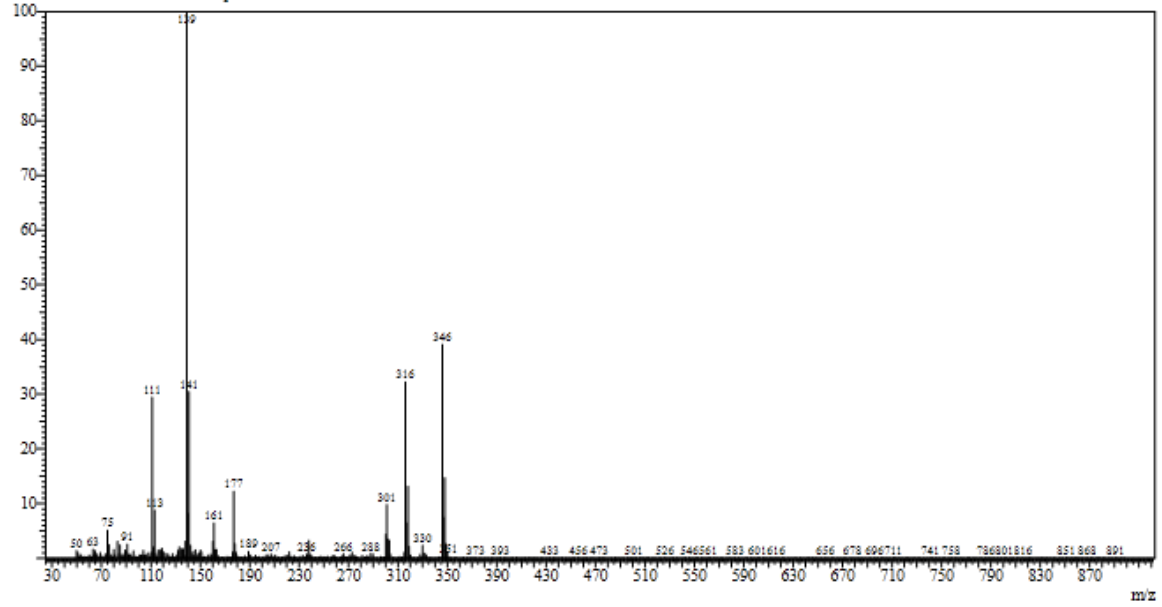

Mass spectra of *(4-chlorophenyl)(4-Methyl-7-nitro-4H-benzo[b][1,4]thiazin-2-yl)methanone* (3g)

Spectrum

Line# 1 R.Time: 8.970 (Scan#: 1695)

MassPeaks: 536

RawMode: Averaged 8.965-8.975 (1694-1696) BasePeak: 185 (216814)

BG Mode: Calc. from Peak Group 1 - Event 1 Scan

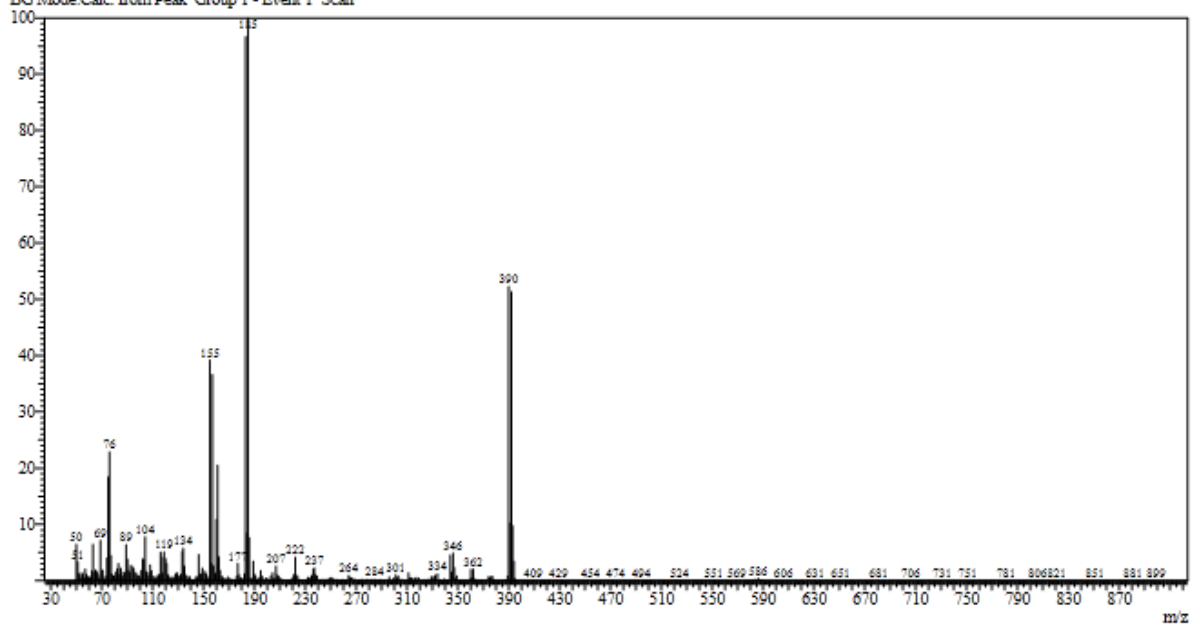

Mass spectra of *(4-bromophenyl)(4-methyl-7-nitro-4H-benzo[b][1,4]thiazin-2-yl) methanone (3h)*

WATERS, Q-TOF MICROMASS (LC-MS)  
SIMERPREET BN-4 2 (0.023) Cm (1:18)

SAIF/CIL, PANJAB UNIVERSITY, CHANDIGARH  
TOF MS ES+  
1.11e4

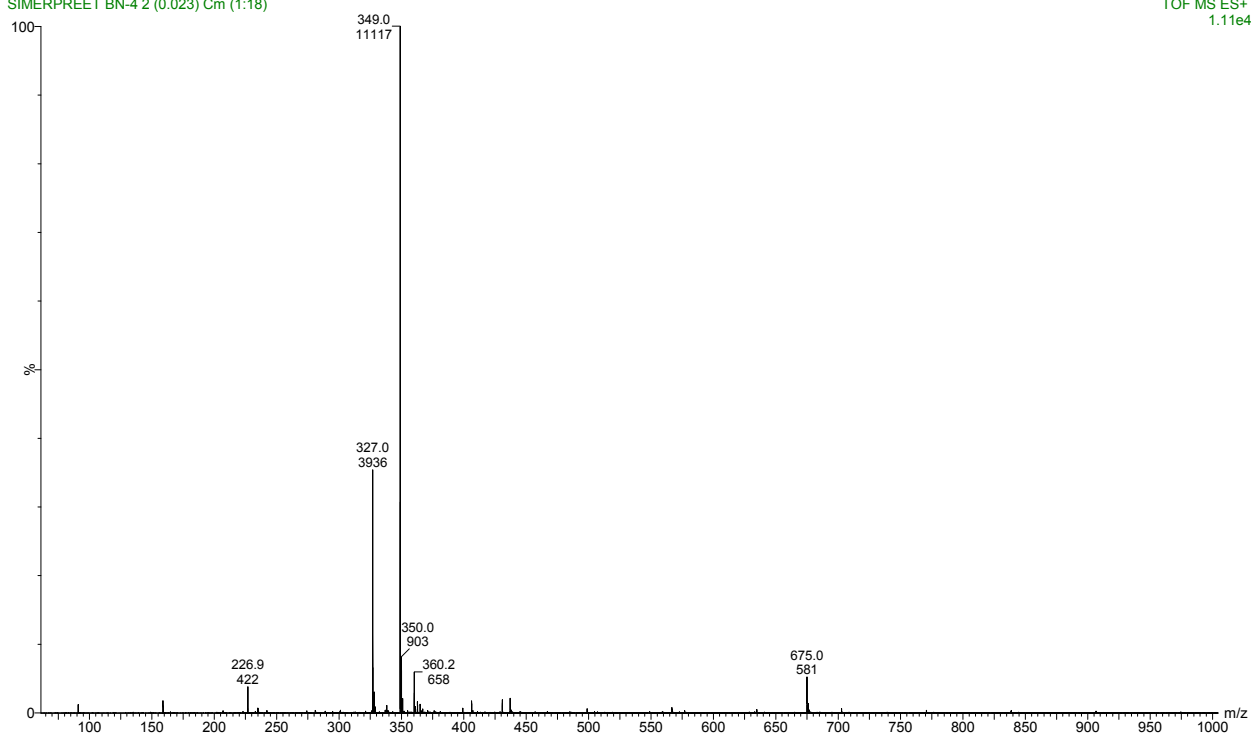

*Mass spectra of (4-Methyl-7-nitro-4H-benzo[b][1,4]thiazin-2-yl)(p-tolyl)methanone (3i)*

RC SAIF PU, Chandigarh

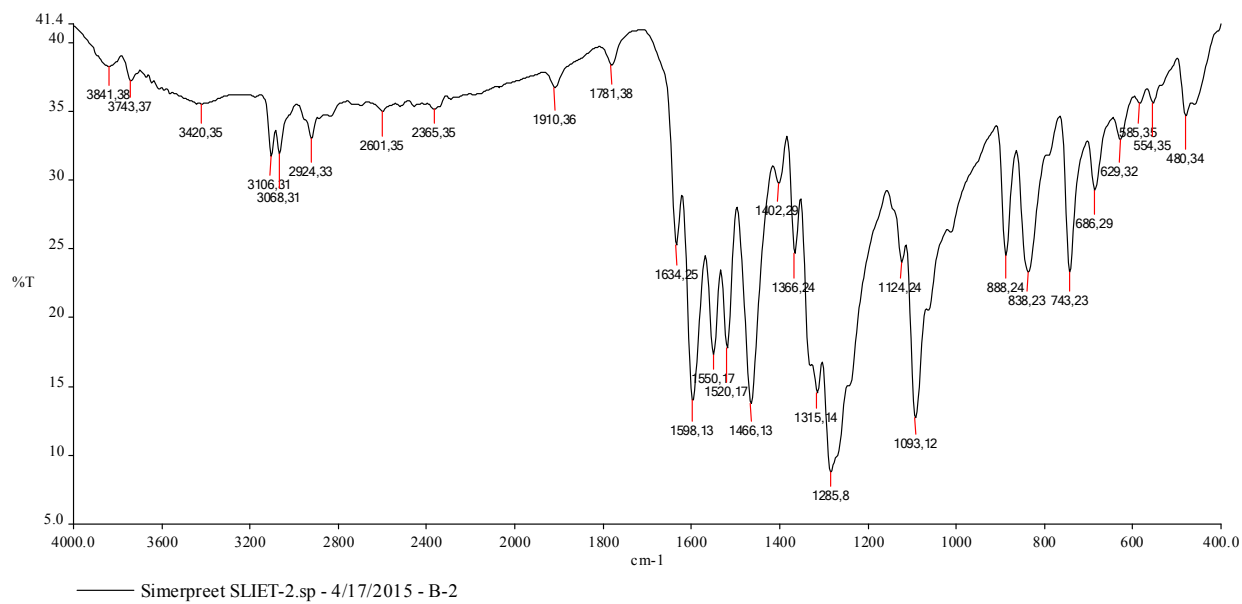

IR spectra of (4-chlorophenyl)(4-Methyl-7-nitro-4H-benzo[b][1,4]thiazin-2-yl)methanone (3g)

**Scheme.** Synthesis of N-methyl 1,3-benzothiazolium iodide (2)

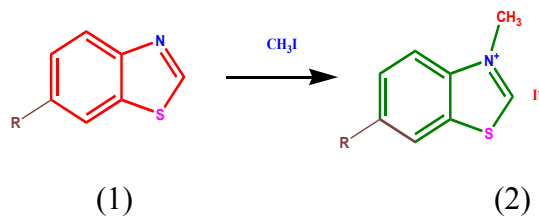

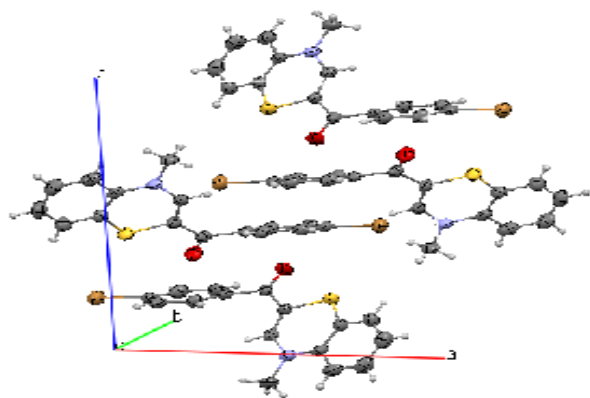

Figure 4. Crystal packing arrangement along a,b,c coordinates

Table: Comparison of conventional and ultrasonication method

| S.no | Compounds | Conventional Time/ Yield | Ultrasonication Time/Yield | PTC     |
|------|-----------|--------------------------|----------------------------|---------|
| 1.   | 3(a)      | 4 hrs/ 40%               | 25 mins/ 70%               | 35 mins |
| 2.   | 3(b)      | 4 hrs/ 40%               | 25 mins/ 72%               | 35 mins |
| 3.   | 3(c)      | 4 hrs/ 42%               | 30 mins/ 75%               | 40 mins |
| 4.   | 3(d)      | 4hrs 30 mins/ 45%        | 30 mins/ 72%               | 40 mins |
| 5.   | 3(e)      | 4 hrs 15 mins/ 42%       | 30 mins/ 78%               | 38 mins |
| 6.   | 3(f)      | 4 hrs/ 41%               | 25 mins/ 76%               | 35mins  |
| 7.   | 3(g)      | 4 hrs 10 mins/ 44%       | 25 mins/ 78%               | 40mins  |
| 8.   | 3(h)      | 4hrs 30 mins/ 46%        | 30 mins/ 82%               | 30 mins |
| 9.   | 3(i)      | 4 hrs 15 mins/ 43%       | 30 mins/ 80%               | 40 mins |
